# Supplementary material for: Structure and inhibitor specificity of the PCTAIRE-family kinase CDK16
Source: Oxford University Press journal article supplement (doi:10.1042/bcj20160941), 2017-01-06
Supplement: bcj-2016-0941_supp.pdf [file bcj-2016-0941_supp.pdf]

## **Structure and inhibitor specificity of the PCTAIRE-family kinase CDK16**

Sarah E. Dixon-Clarke, Saifeldin N. Shehata, Tobias Krojer, Timothy D. Sharpe, Frank von Delft, Kei Sakamoto, Alex N. Bullock

### **SUPPLEMENTARY MATERIAL**

#### **SUPPLEMENTARY METHODS**

##### **Knockdown of CDK16**

The specificity of the anti-CDK16 antibody (HPA001366, Sigma) was tested using siRNA-mediated knockdown of CDK16 in IGR-37 melanoma cells. IGR-37 melanoma cells were plated at 5000 cells per well in 6-well plates. After 24 hours, cells were transfected with different siRNA targeting human CDK16, cyclin Y or scrambled control, at a final concentration of 25 nM using Dharmacon DharmaFECT transfection reagents (Dharmafect reagent at 10 uL per well) according to the manufacturer's instructions (GE Healthcare Dharmacon). Validation of RNAi gene silencing was evaluated 72 hours after transfection by immunoblotting for protein expression. Dharmacon ON-TARGETplus SMARTpool siRNA were used for all knockdown experiments.

## SUPPLEMENTAL TABLES

**Table S1 DSF screening data for Calbiochem compounds**

| Compound                                      | Tm Shift (°C) | Compound                           | Tm Shift (°C) |
|-----------------------------------------------|---------------|------------------------------------|---------------|
| Cdk1/2 Inhibitor III                          | 9.6           | JAK Inhibitor I                    | 1.0           |
| Alsterpaullone, 2-Cyanoethyl                  | 7.9           | PIM1 Inhib II                      | 1.0           |
| Indirubin E804                                | 7.6           | Compound 52                        | 0.9           |
| Cdk2/9 Inhibitor                              | 7.2           | IKK-2 Inhibitor VI                 | 0.9           |
| Aurora/Cdk Inhibitor                          | 6.7           | H-89                               | 0.9           |
| (Z,E)-3-(Imidazol-4-ylmethylene)indolin-2-one | 6.7           | GSK-3beta Inhibitor VIII           | 0.9           |
| Indirubin-3'-monoxime-5-sulphonic acid        | 6.7           | Bosutinib                          | 0.9           |
| Flt3 Inhib III                                | 6.6           | EGFR Inhibitor                     | 0.8           |
| 5-iodo-Indirubin-3'-monoxime                  | 6.1           | GTP-14564                          | 0.8           |
| SU9516                                        | 6.0           | Ellipticine                        | 0.8           |
| Cdk/Crk Inhibitor                             | 6.0           | IGF-1R Inhibitor II                | 0.8           |
| Alsterpaullone                                | 5.5           | Syk Inhibitor II                   | 0.8           |
| GSK-3 Inhibitor IX                            | 5.3           | Roscovitine                        | 0.7           |
| Cdk2 Inhibitor II                             | 5.3           | 10Z-Hymenialdisine                 | 0.7           |
| Quercetin                                     | 5.1           | ST638                              | 0.7           |
| Flt3 Inhib III                                | 4.8           | Emodin                             | 0.7           |
| Raf1 kinase inhibitor II                      | 4.7           | Tpl2 Inhibitor                     | 0.7           |
| Damnacanthal                                  | 4.4           | GSK-3 inhibitor X                  | 0.6           |
| BIM I                                         | 3.9           | Lck Inhibitor III                  | 0.6           |
| Indirubin-3monoxime                           | 3.9           | Diacylglycerol Kinase Inhibitor I  | 0.6           |
| SU11652                                       | 3.9           | PDGF RTKinase Inhibitor IV         | 0.6           |
| NSC-664704                                    | 3.8           | VEGF Receptor 2 Kinase Inhibitor   | 0.5           |
| Oxindole I                                    | 3.8           | HA 1004                            | 0.5           |
| Cdk1 Inhibitor                                | 3.7           | SU6656                             | 0.5           |
| IKK Inhibitor VII                             | 3.5           | SB 220025                          | 0.5           |
| Curcumin                                      | 3.3           | Cdk Inhibitor, p35                 | 0.5           |
| c-Met kinase inhibitor II                     | 3.2           | Genistein                          | 0.5           |
| TX-1123                                       | 3.2           | PD173074                           | 0.5           |
| TX-1918                                       | 3.0           | piceatannol                        | 0.4           |
| PI3/CK2 Inhib                                 | 3.0           | ST638                              | 0.4           |
| VEGFR 2/3 Inhibitor                           | 3.0           | HA 1077                            | 0.4           |
| GSK inhibitor XIII                            | 2.9           | A3                                 | 0.4           |
| Wee1/Chk1 inhibitor                           | 2.9           | PI3Kg inhib                        | 0.4           |
| K252a                                         | 2.7           | PIM1 Inhib II                      | 0.4           |
| Apigenin                                      | 2.6           | Erbstatin Analog                   | 0.4           |
| Aminopurvalanol                               | 2.6           | JNK Inhib IX                       | 0.3           |
| Aloisine A                                    | 2.5           | SB 239063                          | 0.3           |
| JNK inhib V                                   | 2.4           | LY 364947                          | 0.3           |
| Syk Inhibitor                                 | 2.4           | IKK-3 Inhibitor IX                 | 0.3           |
| Purvalanol A                                  | 2.3           | BPDQ                               | 0.3           |
| isogranulatimide                              | 2.3           | Cdk1 Inhibitor III                 | 0.3           |
| NU6102; Cdk 1/2 inhibitor II                  | 2.1           | Diacylglycerol Kinase Inhibitor II | 0.3           |
| PI3/CK2 Inhib                                 | 1.9           | PI-103                             | 0.3           |
| ATM/ATR inhibitor                             | 1.8           | Aurora Kinase Inhibitor II         | 0.3           |
| Raf1 kinase inhibitor I                       | 1.7           | JNK inhib VIII                     | 0.3           |
| JNK Inhibitor II; SAPK Inhibitor II           | 1.6           | IKK Inhibitor X                    | 0.2           |
| BIBX1382                                      | 1.6           | ML-3163                            | 0.2           |
| Aurora Kinase Inhibitor III                   | 1.4           | H-                                 | 0.2           |
| Cdk1/5 Inhibitor                              | 1.4           | IKK-3 Inhibitor IX                 | 0.2           |
| PKC beta inhibitor                            | 1.3           | Cdk2 Inhibitor III                 | 0.2           |
| Cdk4 Inhibitor                                | 1.2           | 7,8-Dihydroxycoumarin              | 0.2           |
| Wedelolactone                                 | 1.2           | Radicicol                          | 0.2           |
| 5-Iodotubercidin                              | 1.1           | Lavendustin A                      | 0.2           |
| 4,5,6,7-Tetrabromobenzotriazole               | 1.0           | PD 169316                          | 0.2           |

**Table S1 cont. DSF screening data for Calbiochem compounds**

| <b>Compound</b>                    | <b>Tm Shift<br/>(°C)</b> | <b>Compound</b>                   | <b>Tm Shift<br/>(°C)</b> |
|------------------------------------|--------------------------|-----------------------------------|--------------------------|
| PI3Kg inhib                        | 0.2                      | SB 202190                         | -0.4                     |
| Bohemine                           | 0.2                      | SB 218078                         | -0.4                     |
| VEGF RTKinase Inhibitor III        | 0.2                      | GSK-3 Inhibitor II                | -0.4                     |
| TGFb RI Inhibitor IV               | 0.2                      | SB 203580                         | -0.4                     |
| AG 1879                            | 0.1                      | MEK1/2 Inhibitor                  | -0.5                     |
| GSK inhibitor XII                  | 0.1                      | Cdk4 inhibitor III                | -0.5                     |
| Flt3 inhibitor                     | 0.1                      | AS041164                          | -0.6                     |
| PD 153035                          | 0.1                      | Diacylglycerol Kinase Inhibitor I | -0.6                     |
| PI3Kg inhib II                     | 0.1                      | FASCAPLYSIN                       | -0.6                     |
| Pfmrk Inhibitor                    | 0.1                      | ERK Inhibitor II                  | -0.6                     |
| IKK Inhibitor X                    | 0.1                      | cFMS Receptor Inhibitor III       | -0.6                     |
| TGFb RI Inhibitor III              | 0.1                      | Chk2 inhibitor II                 | -0.6                     |
| SL327                              | 0.1                      | Scytonemin                        | -0.7                     |
| DNA-PK Inhibitor II                | 0.1                      | GSK-3beta inhibitor III           | -0.7                     |
| 6 DMAP                             | 0.1                      | MEK Inhibitor I                   | -0.8                     |
| BAY 61-3606                        | 0.1                      | U0126                             | -0.9                     |
| cFMS Receptor Inhibitor IV         | 0.1                      | p38 MAP kinase inhibitor V        | -0.9                     |
| MEK Inhibitor II                   | 0.1                      | (-)-Arctigenin                    | -1.0                     |
| ML-9                               | 0.1                      |                                   |                          |
| PLK inhibitor I                    | 0.1                      |                                   |                          |
| 1-Na-PP1                           | 0.1                      |                                   |                          |
| TYRPHOSTIN B48                     | 0.1                      |                                   |                          |
| Debromohymenialdisine              | 0.1                      |                                   |                          |
| Cdk1 inhibitor                     | 0.0                      |                                   |                          |
| JNK Inhib IX                       | 0.0                      |                                   |                          |
| PI 3-K Inhibitor IV                | 0.0                      |                                   |                          |
| KN-93                              | 0.0                      |                                   |                          |
| p38 MAP kinase Inhibitor III       | 0.0                      |                                   |                          |
| cFMS RTKinase inhibitor            | 0.0                      |                                   |                          |
| p38 MAP kinase inhibitor           | 0.0                      |                                   |                          |
| 5,6-Dichlorobenzimidazole Riboside | -0.1                     |                                   |                          |
| ERK Inhibitor                      | -0.1                     |                                   |                          |
| IC261                              | -0.1                     |                                   |                          |
| Y-27632                            | -0.1                     |                                   |                          |
| Dmbi                               | -0.1                     |                                   |                          |
| PNU 112455A; Cdk2/5 Inhibitor      | -0.1                     |                                   |                          |
| TG003                              | -0.1                     |                                   |                          |
| Casein Kinase I Inhibitor          | -0.1                     |                                   |                          |
| PDK/AKT inhibitor                  | -0.2                     |                                   |                          |
| WHI-P180                           | -0.2                     |                                   |                          |
| Olomoucine                         | -0.2                     |                                   |                          |
| Tyrphostin B42                     | -0.2                     |                                   |                          |
| PI3Kg inhib II                     | -0.2                     |                                   |                          |
| LAVENDUSTIN C                      | -0.2                     |                                   |                          |
| VEGF Receptor 2 Kinase Inhibitor I | -0.2                     |                                   |                          |
| Tyrphostin A23                     | -0.2                     |                                   |                          |
| PLK inhibitor I                    | -0.2                     |                                   |                          |
| Bcr-abl Inhibitor II               | -0.2                     |                                   |                          |
| PD 98059                           | -0.2                     |                                   |                          |
| Geldanamycin                       | -0.3                     |                                   |                          |
| TGFb RI Inhibitor IV               | -0.3                     |                                   |                          |
| ZM 336372                          | -0.3                     |                                   |                          |
| LY 364947                          | -0.3                     |                                   |                          |
| TGFb RI Inhibitor III              | -0.3                     |                                   |                          |

**Table S2 DSF screening data for PKIS compounds**

| <b>Compound</b> | <b>T<sub>m</sub> Shift<br/>(°C)</b> | <b>Compound</b> | <b>T<sub>m</sub> Shift<br/>(°C)</b> | <b>Compound</b> | <b>T<sub>m</sub> Shift<br/>(°C)</b> |
|-----------------|-------------------------------------|-----------------|-------------------------------------|-----------------|-------------------------------------|
| GW300657X       | 8.8                                 | GW458787A       | 1.2                                 | GW643971X       | 0.5                                 |
| GW416981X       | 8.7                                 | SB-390527       | 1.2                                 | GW278681X       | 0.5                                 |
| GW779439X       | 8.1                                 | GW806776X       | 1.1                                 | GW441756X       | 0.5                                 |
| GW300660X       | 6.8                                 | GW784752X       | 1.1                                 | GW794607X       | 0.5                                 |
| GW301784X       | 6.0                                 | SB-242718       | 1.1                                 | GW445015X       | 0.5                                 |
| GSK238583A      | 5.8                                 | GW275616X       | 1.1                                 | GW574782A       | 0.5                                 |
| SB-732881-H     | 5.5                                 | GW782612X       | 1.1                                 | GW693481X       | 0.5                                 |
| SB-739245-AC    | 5.4                                 | GSK317354A      | 1.0                                 | GW827105X       | 0.5                                 |
| SB-732881       | 5.3                                 | GW830263A       | 1.0                                 | GSK711701A      | 0.4                                 |
| GW780056X       | 4.8                                 | GW796921X       | 1.0                                 | GW559768X       | 0.4                                 |
| GW276655X       | 4.7                                 | GW806290X       | 1.0                                 | SB-390523       | 0.4                                 |
| GW580509X       | 4.5                                 | GW589933X       | 1.0                                 | SB-711237       | 0.4                                 |
| GW784307A       | 4.5                                 | GW831090X       | 1.09                                | GR105659X       | 0.4                                 |
| GW290597X       | 4.5                                 | SB-409514       | 1.0                                 | GSK2186269A     | 0.4                                 |
| GW831091X       | 4.1                                 | SB-750140       | 1.0                                 | GW442130X       | 0.4                                 |
| SB-278539       | 3.9                                 | GW700494A       | 0.9                                 | GW781673X       | 0.4                                 |
| SB-686709-A     | 3.9                                 | SB-739452       | 0.9                                 | GW813360X       | 0.4                                 |
| GW795493X       | 3.9                                 | GW406108X       | 0.9                                 | SB-242721       | 0.4                                 |
| GW352430A       | 3.8                                 | GW549390X       | 0.9                                 | GSK466317A      | 0.4                                 |
| SB-278538       | 3.7                                 | GW810372X       | 0.9                                 | GSK1007102B     | 0.4                                 |
| GW572399X       | 3.7                                 | GW627512B       | 0.9                                 | GW759710A       | 0.4                                 |
| GW280670X       | 3.6                                 | SB-376719       | 0.8                                 | GSK300014A      | 0.4                                 |
| SB-675259-M     | 3.4                                 | GW801372X       | 0.8                                 | GSK994854A      | 0.4                                 |
| GW335962X       | 3.3                                 | GW305178X       | 0.8                                 | GW445017X       | 0.4                                 |
| GW814408X       | 3.2                                 | GSK1326255A     | 0.8                                 | GW575533A       | 0.4                                 |
| GW778894X       | 3.0                                 | GW583373A       | 0.8                                 | GW833373X       | 0.4                                 |
| GW618013A       | 3.0                                 | GW806742X       | 0.8                                 | SB-284847-BT    | 0.4                                 |
| SB-725317       | 2.9                                 | GW673715X       | 0.8                                 | GW827106X       | 0.4                                 |
| GW824645A       | 2.9                                 | GSK182497A      | 0.8                                 | GW830900A       | 0.4                                 |
| SB-742865       | 2.9                                 | GW809897X       | 0.7                                 | GSK586581A      | 0.4                                 |
| SB-732941       | 2.8                                 | GW578748X       | 0.7                                 | GW407323A       | 0.3                                 |
| GW708336X       | 2.6                                 | GW568377A       | 0.7                                 | GSK625137A      | 0.3                                 |
| GW441806A       | 2.5                                 | GW743024X       | 0.7                                 | GW827102X       | 0.3                                 |
| GW631581B       | 2.4                                 | GW861893X       | 0.7                                 | SB-220025-R     | 0.3                                 |
| SB-678557-A     | 2.4                                 | GW615311X       | 0.7                                 | SB-264865       | 0.3                                 |
| SB-698596-AC    | 2.2                                 | GW811168X       | 0.7                                 | GSK2220400A     | 0.3                                 |
| GW654652C       | 2.1                                 | GW627834A       | 0.7                                 | GW282449A       | 0.3                                 |
| GW771127A       | 1.9                                 | GSK2163632A     | 0.6                                 | GW820759X       | 0.3                                 |
| SB-735465       | 1.9                                 | GW300653X       | 0.6                                 | SB-251527       | 0.3                                 |
| GW680908A       | 1.8                                 | GW632046X       | 0.6                                 | GW275944X       | 0.3                                 |
| GW770249A       | 1.7                                 | GW301888X       | 0.6                                 | GW569530A       | 0.3                                 |
| GW581744X       | 1.7                                 | GW435821X       | 0.6                                 | GW620972X       | 0.3                                 |
| GW284408X       | 1.6                                 | GW794726X       | 0.6                                 | SB-741905       | 0.3                                 |
| GSK614526A      | 1.6                                 | SB-742864       | 0.6                                 | GW439255X       | 0.3                                 |
| SB-245392       | 1.6                                 | GW297361X       | 0.6                                 | GW440139A       | 0.3                                 |
| SB-361058       | 1.5                                 | SB-738482       | 0.6                                 | GW607049C       | 0.3                                 |
| GW810576X       | 1.4                                 | SB-743899       | 0.6                                 | GW612286X       | 0.3                                 |
| GW683768X       | 1.4                                 | GW829906X       | 0.6                                 | SB-226879       | 0.3                                 |
| SB-735467       | 1.4                                 | GW829877X       | 0.6                                 | SB-734117       | 0.3                                 |
| GW513184X       | 1.3                                 | GSK980961A      | 0.5                                 | GW577921A       | 0.3                                 |
| GW301789X       | 1.3                                 | GW680191X       | 0.5                                 | GW679410X       | 0.3                                 |
| GW450241X       | 1.3                                 | GSK953913A      | 0.5                                 | GSK978744A      | 0.3                                 |
| GW416469X       | 1.2                                 | GSK2110236A     | 0.5                                 | GW784684X       | 0.3                                 |
| GW566221A       | 1.2                                 | GW396574X       | 0.5                                 | GW827396X       | 0.2                                 |

**Table S2 cont. DSF screening data for PKIS compounds**

| Compound    | T <sub>m</sub> Shift (°C) | Compound    | T <sub>m</sub> Shift (°C) | Compound     | T <sub>m</sub> Shift (°C) |
|-------------|---------------------------|-------------|---------------------------|--------------|---------------------------|
| SB-737198   | 0.2                       | GSK299115A  | 0.1                       | GSK635416A   | 0.0                       |
| GSK1173862A | 0.2                       | GW621431X   | 0.1                       | GW772405X    | 0.0                       |
| GSK269962B  | 0.2                       | GW633459A   | 0.1                       | GW775608X    | 0.0                       |
| GW807930X   | 0.2                       | GW683003X   | 0.1                       | GW837331X    | 0.0                       |
| GW567808A   | 0.2                       | GSK200398A  | 0.1                       | SKF-86055    | 0.0                       |
| SB-738561   | 0.2                       | GW829055X   | 0.1                       | GSK2213727A  | -0.1                      |
| GSK620503A  | 0.2                       | SB-253228   | 0.1                       | GSK317314A   | -0.1                      |
| SB-239272   | 0.2                       | GR269666A   | 0.1                       | GW701032X    | -0.1                      |
| GW644007X   | 0.2                       | GSK326090A  | 0.1                       | SB-476429-A  | -0.1                      |
| GW659893X   | 0.2                       | GW769076X   | 0.1                       | GSK192082A   | -0.1                      |
| SB-772077-B | 0.2                       | GW796920X   | 0.1                       | GW445012X    | -0.1                      |
| GSK2219385A | 0.2                       | GW829115X   | 0.1                       | GW782912X    | -0.1                      |
| GW575808A   | 0.2                       | SB-264866   | 0.1                       | GW805758X    | -0.1                      |
| GW693917A   | 0.2                       | SB-759335-B | 0.1                       | GW829874X    | -0.1                      |
| GW827099X   | 0.2                       | GSK237700A  | 0.1                       | GW846105X    | -0.1                      |
| SB-431542-A | 0.2                       | GW429374A   | 0.1                       | GW869810X    | -0.1                      |
| GI261520A   | 0.2                       | GW785404X   | 0.1                       | SB-285234-W  | -0.1                      |
| GSK579289A  | 0.2                       | GW832467X   | 0.1                       | SB-657836-   | -0.1                      |
| GW576609A   | 0.2                       | GSK180736A  | 0.1                       | GW684626B    | -0.1                      |
| GW711782X   | 0.2                       | GSK237701A  | 0.1                       | SB-333612    | -0.1                      |
| GW819230X   | 0.2                       | GW641155A   | 0.1                       | GSK938890A   | -0.1                      |
| GW876790X   | 0.2                       | GW695874X   | 0.1                       | GW284372X    | -0.1                      |
| SB-242717   | 0.2                       | GSK248233A  | 0.0                       | GW405841X    | -0.1                      |
| SB-242719   | 0.2                       | GW572738X   | 0.0                       | GW461104A    | -0.1                      |
| GSK238063A  | 0.2                       | GW682841X   | 0.0                       | SB-236687    | -0.1                      |
| GW282974X   | 0.2                       | GW703087X   | 0.0                       | GSK204925A   | -0.1                      |
| SB-347804   | 0.2                       | GW811761X   | 0.0                       | GW458344A    | -0.1                      |
| GW410563A   | 0.2                       | SB-409513   | 0.0                       | GW621823A    | -0.1                      |
| GW651576X   | 0.2                       | GSK605714A  | 0.0                       | GW786460X    | -0.1                      |
| GW770249X   | 0.2                       | GSK718429A  | 0.0                       | GW874091X    | -0.1                      |
| GW828529X   | 0.2                       | GW282536X   | 0.0                       | GW427984X    | -0.1                      |
| GW852849X   | 0.2                       | GW574783B   | 0.0                       | GW434756X    | -0.1                      |
| SB-220455   | 0.2                       | GW785974X   | 0.0                       | SB-682330-A  | -0.1                      |
| SB-250715   | 0.2                       | GSK312948A  | 0.0                       | GW642125X    | -0.1                      |
| GSK1511931A | 0.2                       | GW305074X   | 0.0                       | GW819077X    | -0.1                      |
| GW621970X   | 0.1                       | GW785804X   | 0.0                       | SB-216385    | -0.1                      |
| GW642138X   | 0.1                       | GW817394X   | 0.0                       | SB-630812    | -0.1                      |
| SB-254169   | 0.1                       | GW817396X   | 0.0                       | GSK1023156A  | -0.1                      |
| SB-431533   | 0.1                       | GW843682X   | 0.0                       | GW561436X    | -0.2                      |
| GW616030X   | 0.1                       | GSK1392956A | 0.0                       | GW830365A    | -0.2                      |
| SB-744941   | 0.1                       | GW693881A   | 0.0                       | GSK554170A   | -0.2                      |
| GW770220A   | 0.1                       | SB-751399   | 0.0                       | GW445014X    | -0.2                      |
| GW607117X   | 0.1                       | GSK561866B  | 0.0                       | GW683109X    | -0.2                      |
| GW809885X   | 0.1                       | SB-251505   | 0.0                       | SKF-86002-A2 | -0.2                      |
| GW828525X   | 0.1                       | SB-814597   | 0.0                       | GW406731X    | -0.2                      |
| SB-253226   | 0.1                       | SKF-62604   | 0.0                       | GSK943949A   | -0.2                      |
| SB-358518   | 0.1                       | GSK969786A  | 0.0                       | GW549034X    | -0.2                      |
| SB-736302   | 0.1                       | SB-751148   | 0.0                       | GSK1030058A  | -0.2                      |
| GSK1751853A | 0.1                       | GW569293E   | 0.0                       | GSK949675A   | -0.2                      |
| GSK619487A  | 0.1                       | GW807982X   | 0.0                       | SB-610251-B  | -0.2                      |
| GW459057A   | 0.1                       | SB-736290   | 0.0                       | SB-633825    | -0.2                      |
| GW576924A   | 0.1                       | GW680975X   | 0.0                       | GW572401X    | -0.2                      |
| GW701427A   | 0.1                       | GSK270822A  | 0.0                       | GW678313X    | -0.2                      |
| GW795486X   | 0.1                       | GSK571989A  | 0.0                       | SB-223133    | -0.2                      |

**Table S2 cont. DSF screening data for PKIS compounds**

| <b>Compound</b> | <b>T<sub>m</sub> Shift<br/>(°C)</b> |
|-----------------|-------------------------------------|
| GW580496A       | -0.2                                |
| GW804482X       | -0.2                                |
| GW856804X       | -0.2                                |
| SB-220025-A     | -0.2                                |
| SB-221466       | -0.2                                |
| GW683134A       | -0.2                                |
| GW694234A       | -0.2                                |
| SB-210313       | -0.2                                |
| SB-360741       | -0.2                                |
| SB-400868-A     | -0.2                                |
| GSK1819799A     | -0.3                                |
| GW432441X       | -0.3                                |
| GW708893X       | -0.3                                |
| GW782907X       | -0.3                                |
| GSK317315A      | -0.3                                |
| SB-437013       | -0.3                                |
| GW568326X       | -0.3                                |
| GSK1220512A     | -0.3                                |
| GSK1000163A     | -0.3                                |
| GW296115X       | -0.3                                |
| GW799251X       | -0.3                                |
| GSK1713088A     | -0.3                                |
| GW576484X       | -0.3                                |
| GW768505A       | -0.3                                |
| GSK1030061A     | -0.4                                |
| SB-614067-R     | -0.4                                |
| GW279320X       | -0.4                                |
| GSK466314A      | -0.4                                |
| GW780159X       | -0.4                                |
| GW853606X       | -0.4                                |
| GW659386A       | -0.4                                |
| GW622055X       | -0.4                                |
| GW694590A       | -0.4                                |
| GSK1030062A     | -0.4                                |
| GW632580X       | -0.5                                |
| GW853609X       | -0.5                                |
| GSK259178A      | -0.5                                |
| GSK319347A      | -0.5                                |
| GW734508X       | -0.5                                |
| GSK1030059A     | -0.5                                |
| GW589961A       | -0.6                                |
| SB-590885-      | -0.6                                |
| GW709042A       | -0.7                                |

**Table S3 DSF screening data for clinical kinase inhibitors**

| <b>Compound</b>   | <b>T<sub>m</sub> Shift (°C)</b> | <b>Compound</b> | <b>T<sub>m</sub> Shift (°C)</b> | <b>Compound</b> | <b>T<sub>m</sub> Shift (°C)</b> |
|-------------------|---------------------------------|-----------------|---------------------------------|-----------------|---------------------------------|
| Rebastinib        | 12.6                            | Rabusertib      | 0.2                             | Nintedanib      | -0.3                            |
| Dabrafenib        | 10.4                            | AP26113         | 0.2                             | AZD2014         | -0.3                            |
| SNS-032           | 7.0                             | Seliciclib      | 0.2                             | AZ3146          | -0.3                            |
| Milciclib         | 6.2                             | GSK2334470      | 0.2                             | KX2-391         | -0.3                            |
| AZ23              | 5.8                             | Doramapimod     | 0.2                             | MK-2206         | -0.3                            |
| AT9283            | 5.7                             | SGI-1776        | 0.2                             | EMD1214063      | -0.3                            |
| Ponatinib         | 5.5                             | BI 2536         | 0.2                             | PF-670462       | -0.3                            |
| Dinaciclib        | 4.8                             | GSK2636771      | 0.2                             | Imatinib        | -0.3                            |
| PIK-75            | 4.7                             | BYL719          | 0.1                             | ZSTK474         | -0.3                            |
| Regorafenib       | 4.1                             | Apitolisib      | 0.1                             | BMS-911543      | -0.4                            |
| PF 431396         | 4.1                             | Lenvatinib      | 0.1                             | Alectinib       | -0.4                            |
| PF-03758309       | 4.1                             | Crizotinib      | 0.1                             | ASP3026         | -0.4                            |
| Gandotinib        | 4.0                             | Pilralisib      | 0.1                             | Galunisertib    | -0.4                            |
| Lestaurtinib      | 3.8                             | Dactolisib      | 0.1                             | Vandetanib      | -0.4                            |
| Momelotinib       | 3.7                             | Pimasertib      | 0.1                             | Dasatinib       | -0.4                            |
| TAK-901           | 3.7                             | GSK269962       | 0.1                             | AZD5363         | -0.4                            |
| GSK650394         | 3.3                             | Dovitinib       | 0.1                             | Masitinib       | -0.4                            |
| Foretinib         | 3.3                             | Gefitinib       | 0.0                             | Trametinib      | -0.4                            |
| Fedratinib        | 3.3                             | Tivantinib      | 0.0                             | Buparlisib      | -0.5                            |
| Alvociclib        | 2.9                             | Tofacitinib     | 0.0                             | Ipatasertib     | -0.5                            |
| Crenolanib        | 2.7                             | Erlotinib       | 0.0                             | Linsitinib      | -0.5                            |
| Palbociclib       | 2.6                             | Baricitinib     | 0.0                             | NVP-BGJ398      | -0.5                            |
| LY2874455         | 2.6                             | Lapatinib       | 0.0                             | Bafetinib       | -0.5                            |
| Linifanib         | 2.4                             | OSI-027         | 0.0                             | AZD8330         | -0.5                            |
| MK-1775           | 2.2                             | CUDC-101        | 0.0                             | Selumetinib     | -0.6                            |
| Sotrastaurin      | 2.2                             | Danuseritib     | 0.0                             | PF-04708671     | -0.6                            |
| Sunitinib         | 2.1                             | Volasertib      | -0.1                            | Ralimetinib     | -0.6                            |
| UCN-01            | 2.1                             | Sonolisib       | -0.1                            | Refametinib     | -0.6                            |
| Sorafenib         | 2.0                             | Vatalanib       | -0.1                            | Dacomitinib     | -0.6                            |
| Pictilisib        | 1.5                             | IPI-145         | -0.1                            | Midostaurin     | -0.6                            |
| AZD1480           | 1.3                             | BMS-599626      | -0.1                            | Cediranib       | -0.7                            |
| Cabozantinib      | 1.2                             | Orantinib       | -0.1                            | Alisertib       | -0.7                            |
| AZD4547           | 1.1                             | INK128          | -0.1                            | Brivanib        | -0.7                            |
| Nilotinib         | 1.1                             | Tivozanib       | -0.1                            | VX-11E          | -0.8                            |
| BX-912            | 1.0                             | Axitinib        | -0.1                            | AZD8055         | -0.9                            |
| (5Z)-7-Oxozeaenol | 1.0                             | GSK1904529A     | -0.1                            | Ruxolitinib     | -0.9                            |
| Tamatinib         | 0.9                             | PF-04691502     | -0.1                            |                 |                                 |
| Voxtalisib        | 0.9                             | Ibrutinib       | -0.1                            |                 |                                 |
| PF-00477736       | 0.9                             | MEK-162         | -0.1                            |                 |                                 |
| Pazopanib         | 0.8                             | AZD7762         | -0.1                            |                 |                                 |
| Neratinib         | 0.7                             | TGX-221         | -0.2                            |                 |                                 |
| BMS-754807        | 0.6                             | TAK-733         | -0.2                            |                 |                                 |
| SP600125          | 0.6                             | GSK1838705A     | -0.2                            |                 |                                 |
| Ruboxistaurin     | 0.6                             | Idelalisib      | -0.2                            |                 |                                 |
| Enzastaurin       | 0.6                             | SCH772984       | -0.2                            |                 |                                 |
| Fasudil           | 0.5                             | GSK2126458      | -0.2                            |                 |                                 |
| RAF265            | 0.5                             | Tideglusib      | -0.2                            |                 |                                 |
| Bosutinib         | 0.5                             | Amuvatinib      | -0.2                            |                 |                                 |
| Tandutinib        | 0.4                             | Motesanib       | -0.2                            |                 |                                 |
| AZD1152-HQPA      | 0.4                             | PF-4800567      | -0.2                            |                 |                                 |
| Saracatinib       | 0.4                             | Rigosertib      | -0.3                            |                 |                                 |
| Vemurafenib       | 0.3                             | Afatinib        | -0.3                            |                 |                                 |
| Quizartinib       | 0.3                             | Icotinib        | -0.3                            |                 |                                 |
| MGCD-265          | 0.3                             | Apatinib        | -0.3                            |                 |                                 |

## SUPPLEMENTARY FIGURES

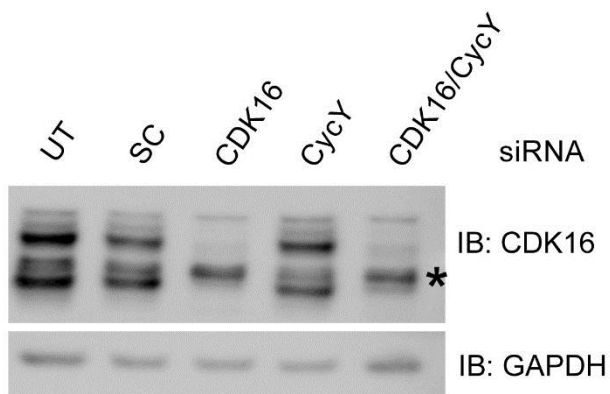

### Figure S1. Knockdown of CDK16

Immunoreactive bands specific for CDK16 were confirmed using siRNA-mediated knockdown of CDK16 in IGR-37 melanoma cells. Scrambled siRNA (SC) and cyclin Y siRNA (CycY) were used as additional controls and compared to untreated (UT) cells. GAPDH protein levels were assessed as a loading control. A non-specific band detected by the anti-CDK16 antibody is indicated by an asterisk.
